# Supplementary material for: Cu+/Ag+ Competition in Type I Copper Proteins (T1Cu)
Source: MDPI journal article supplement (doi:10.3390/biom13040681), 2023-04-17
Supplement: s1 [file s1]

## Article

# Cu<sup>+</sup>/Ag<sup>+</sup> Competition in Type I Copper Proteins (T1Cu)

Nikoleta Kircheva <sup>1</sup>, Silvia Angelova <sup>1</sup>, Stefan Dobrev <sup>1</sup>, Vladislava Petkova <sup>1</sup>, Valya Nikolova <sup>2</sup> and Todor Dudev <sup>2,\*</sup>

<sup>1</sup> Institute of Optical Materials and Technologies “Acad. J. Malinowski”, Bulgarian Academy of Sciences, 1113 Sofia, Bulgaria; nkircheva@iomt.bas.bg (N.K.); sea@iomt.bas.bg (S.A.); sdobrev@iomt.bas.bg (S.D.); vpetkova@iomt.bas.bg (V.P.)

<sup>2</sup> Faculty of Chemistry and Pharmacy, Sofia University “St. Kliment Ohridski”, 1164 Sofia, Bulgaria; ohtvd@chem.uni-sofia.bg

\* Correspondence: t.dudev@chem.uni-sofia.bg

**Table S1.** Bond lengths used for justification of the chosen computational protocol. The experimental data are taken from the Cu<sup>+</sup>/Ag<sup>+</sup> – Azurin structures, corresponding PDB Entries: 1JZG [21] and 3UGE [6].

| Bond Length in Å/<br>Method |                                     | M <sup>+</sup> -<br>N(His1) | M <sup>+</sup> -<br>N(His2) | M <sup>+</sup> -<br>S(Cys) | M <sup>+</sup> -<br>S(Met) | M <sup>+</sup> -<br>O(BKB) |
|-----------------------------|-------------------------------------|-----------------------------|-----------------------------|----------------------------|----------------------------|----------------------------|
| Experiment                  | Cu <sup>+</sup>                     | 2.12                        | 2.06                        | 2.23                       | 3.31                       | 2.67                       |
|                             | Ag <sup>+</sup>                     | 2.45                        | 2.35                        | 2.37                       | 3.09                       | 2.89                       |
|                             | $\Delta(\text{Ag}^+ - \text{Cu}^+)$ | 0.33                        | 0.29                        | 0.14                       | 0.22                       | 0.22                       |
| B3LYP/6-31+G(3d,p)-D3       | Cu <sup>+</sup>                     | 2.12                        | 2.01                        | 2.19                       | 3.55                       | 4.24                       |
|                             | Ag <sup>+</sup>                     | 2.19                        | 2.85                        | 2.37                       | 3.55                       | 4.79                       |
|                             | $\Delta(\text{Ag}^+ - \text{Cu}^+)$ | 0.07                        | 0.84                        | 0.18                       | 0.00                       | 0.55                       |
| M062X/6-31+G(d,p)           | Cu <sup>+</sup>                     | 2.22                        | 2.12                        | 2.32                       | 2.76                       | 4.37                       |
|                             | Ag <sup>+</sup>                     | 2.57                        | 2.31                        | 2.48                       | 3.09                       | 4.44                       |
|                             | $\Delta(\text{Ag}^+ - \text{Cu}^+)$ | 0.35                        | 0.19                        | 0.16                       | 0.33                       | 0.07                       |
| M062X/6-311++(d,p)          | Cu <sup>+</sup>                     | 2.23                        | 2.12                        | 2.33                       | 2.79                       | 4.38                       |
|                             | Ag <sup>+</sup>                     | 2.56                        | 2.31                        | 2.48                       | 3.09                       | 4.42                       |
|                             | $\Delta(\text{Ag}^+ - \text{Cu}^+)$ | 0.33                        | 0.19                        | 0.15                       | 0.30                       | 0.04                       |
